# Supplementary material for: Excessive Supraventricular Ectopic Activity and the Risk of Atrial Fibrillation and Stroke: A Systematic Review and Meta-Analysis
Source: MDPI journal article supplement (doi:10.3390/jcdd9120461), 2022-12-15
Supplement: s1 [file s1]

Search strategy

pubmed

**/\*atrial premature complexes\*/**

1. atrial premature complexes OR premature supraventricular beat OR premature atrial beat OR premature atrial complex OR premature atrial contraction OR atrial ectopic beat OR atrial extrasystole

**/\*stroke\*/**

2. stroke OR cerebrovascular accident OR cerebrovascular apoplexy OR brain vascular accident OR apoplexy

**/\*atrial fibrillation\*/**

3. atrial fibrillation

4. 2 or 3

5. 1 and 4

embase

**/\*atrial premature complexes\*/**

1. exp supraventricular premature beat/ or (atrial premature complexes or premature supraventricular beat or premature atrial beat or premature atrial complex or premature atrial contraction or atrial ectopic beat or atrial extrasystole).mp.

**/\*stroke\*/**

2. exp cerebrovascular accident/ or (stroke or cerebrovascular apoplexy or brain vascular accident or apoplexy).mp.

**/\*atrial fibrillation\*/**

3. exp atrial fibrillation/

4. 2 or 3

5. 1 and 4

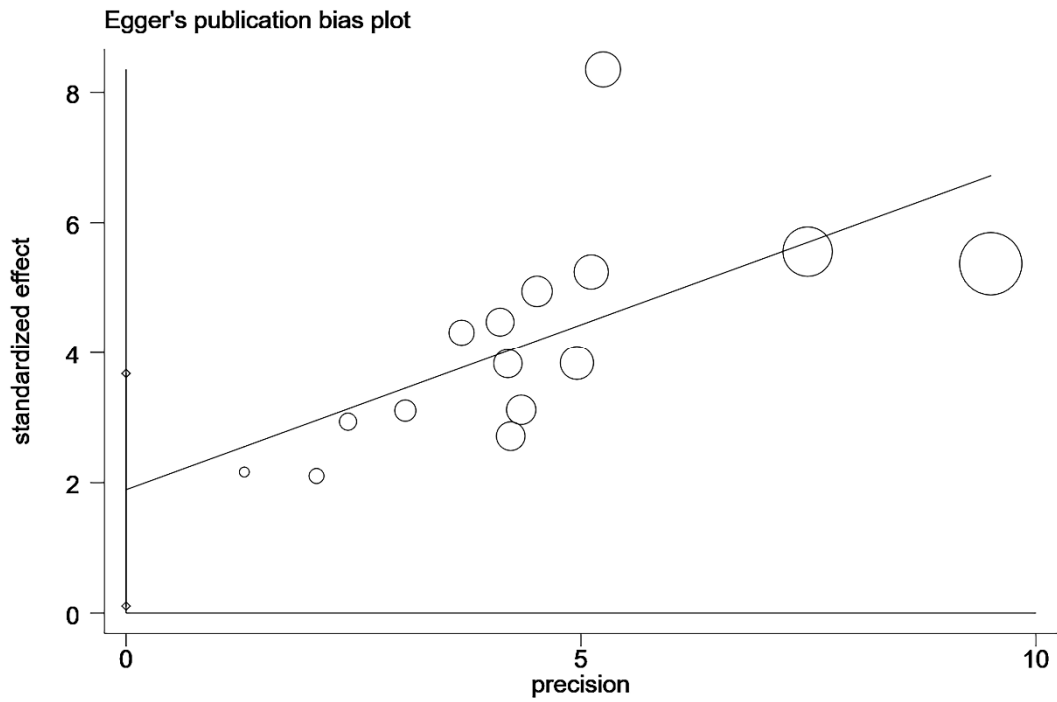

**Figure S1.** The funnel plot for estimating the association between ESVEA and the risk of AF in the general population.

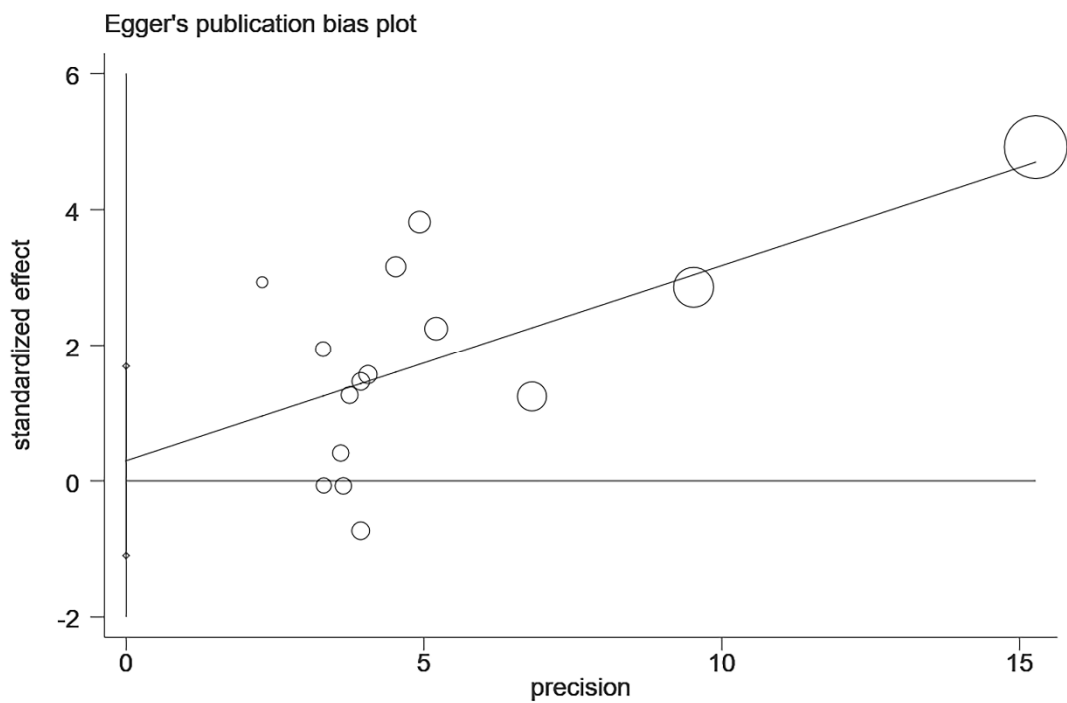

**Figure S2.** The funnel plot for estimating the association between ESVEA and the risk of all-cause mortality.

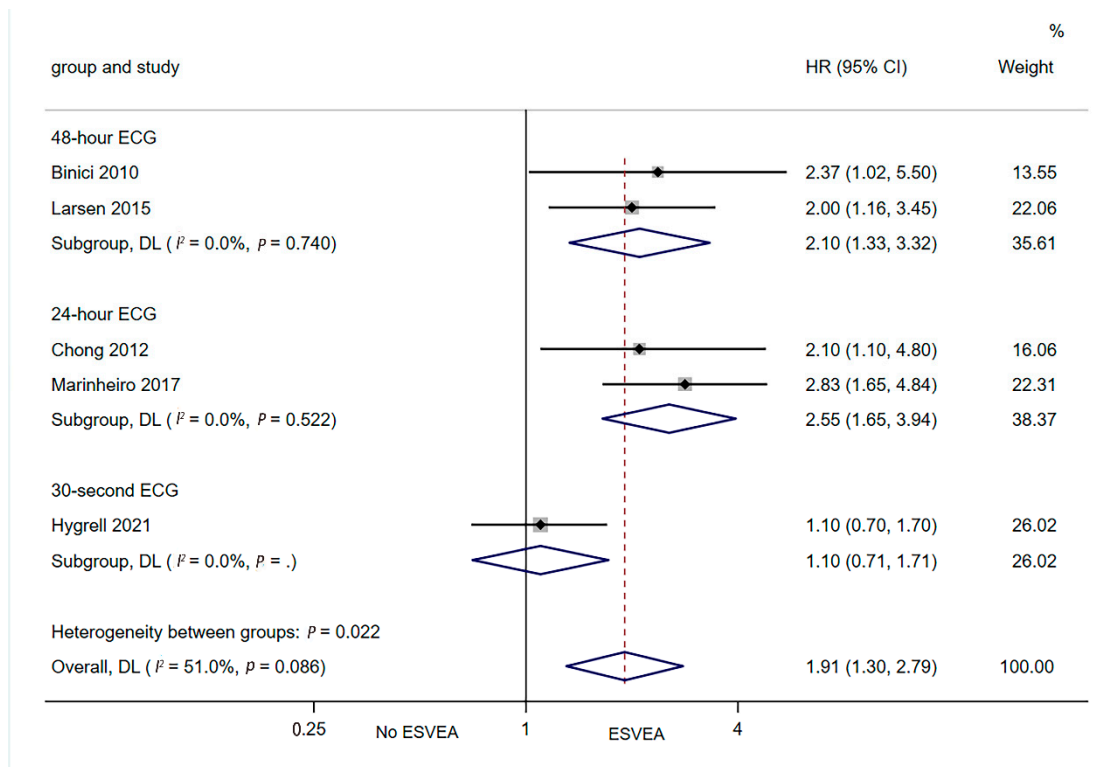

**Figure S3.** Forest plot of the association between ESVEA and new-onset ischemic stroke by subgroups. Abbreviations: ESVEA, excessive supraventricular ectopic activity; HR, hazard ratio; CI, confidence interval. [12, 23, 13, 35, 45]

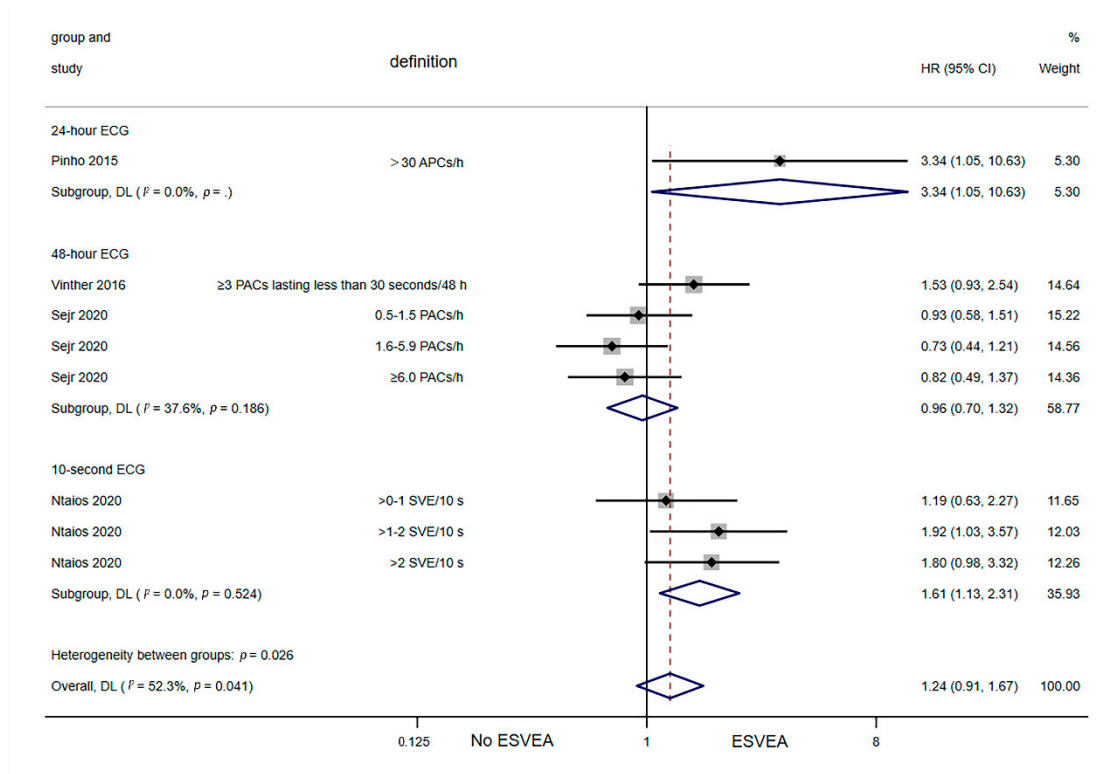

**Figure S4.** Forest plot of the association between ESVEA and recurrent ischemic stroke/transient ischemic attack (TIA) by subgroups. Abbreviations: APCs, atrial premature complexes; PACs, premature atrial complexes; SVE, supraventricular extrasystoles; ESVEA, excessive supraventricular ectopic activity; HR, hazard ratio; CI, confidence interval. Definition represents the definitions of ESVEA in different studies. [42, 22, 40, 39]

**Table S1.** Quality assessment for the included studies.

| Study                | Study type | Selection |   |   |   | Comparability |   | Outcome |   | Total scale |
|----------------------|------------|-----------|---|---|---|---------------|---|---------|---|-------------|
| Binici 2010 [12]     | Cohort     | ★         | ★ | ★ | ★ | ★★            | ★ | ★       | - | 8           |
| Chong 2012 [13]      | Cohort     | ★         | ★ | ★ | ★ | ★★            | ★ | ★       | - | 8           |
| Dewland 2013 [14]    | Cohort     | ★         | ★ | ★ | ★ | ★★            | ★ | ★       | - | 8           |
| Yodogawa 2013 [33]   | Cohort     | ★         | ★ | ★ | ★ | ★★            | ★ | ★       | - | 8           |
| Pinho 2015 [42]      | Cohort     | ★         | ★ | ★ | - | ★★            | ★ | ★       | - | 7           |
| Acharya 2015 [15]    | Cohort     | ★         | ★ | ★ | - | ★★            | ★ | ★       | - | 7           |
| Johnson 2015 [34]    | Cohort     | ★         | ★ | ★ | ★ | ★★            | ★ | ★       | - | 8           |
| Lin 2015 [43]        | Cohort     | ★         | ★ | ★ | - | ★★            | ★ | ★       | - | 7           |
| Larsen 2015 [23]     | Cohort     | ★         | ★ | ★ | ★ | ★★            | ★ | ★       | ★ | 9           |
| Vinther 2016 [22]    | Cohort     | ★         | ★ | ★ | - | ★★            | ★ | ★       | ★ | 8           |
| Cabrera 2016 [44]    | Cohort     | ★         | ★ | ★ | - | ★★            | ★ | ★       | ★ | 8           |
| Marinheiro 2017 [35] | Cohort     | ★         | ★ | ★ | ★ | ★★            | ★ | ★       | ★ | 9           |
| Vinther 2017 [36]    | Cohort     | ★         | ★ | ★ | - | ★★            | ★ | ★       | ★ | 8           |
| Raman 2017 [37]      | Cohort     | ★         | ★ | ★ | ★ | ★★            | ★ | ★       | - | 8           |
| Persson 2019 [38]    | Cohort     | ★         | ★ | ★ | ★ | ★★            | ★ | ★       | ★ | 9           |
| Ntaios 2020 [39]     | Cohort     | ★         | ★ | ★ | - | ★★            | ★ | ★       | - | 7           |

|                   |        |   |   |   |   |    |   |   |   |   |
|-------------------|--------|---|---|---|---|----|---|---|---|---|
| Sejr 2020 [40]    | Cohort | ★ | ★ | ★ | - | ★★ | ★ | ★ | - | 7 |
| Hygrell 2021 [45] | Cohort | ★ | ★ | ★ | - | ★★ | ★ | ★ | ★ | 8 |
| Sasaki 2021 [46]  | Cohort | ★ | ★ | ★ | - | ★★ | ★ | ★ | - | 7 |
| Vetta 2022 [41]   | Cohort | ★ | ★ | ★ | ★ | ★★ | ★ | ★ | - | 8 |

One “★” represents one point; “-” represents no points
